# Supplementary material for: Xylene gas sensor based on Ni doped TiO2 bowl-like submicron particles with enhanced sensing performance
Source: Royal Society of Chemistry journal article supplement (doi:10.1039/c5ra01395j), 2015-01-01
Supplement: c5ra01395j1.pdf [file c5ra01395j1.pdf]

**Electronic supplementary information**

**Xylene gas sensor based on Ni doped TiO<sub>2</sub> bowl-like  
submicron particles with enhanced sensing performance**

Linghui Zhu,<sup>a</sup> Dezhong Zhang,<sup>b</sup> Ying Wang,<sup>b</sup> Caihui Feng,<sup>c</sup> Jingran Zhou,<sup>b</sup> Caixia Liu,<sup>a,\*</sup>  
Shengping Ruan<sup>b,\*</sup>

<sup>a</sup> State Key Laboratory on Integrated Optoelectronics, Jilin University, Changchun 130012, P. R. China

<sup>b</sup> College of Electronic Science and Engineering, Jilin University, Changchun 130012, P. R. China

<sup>c</sup> College of Instrumentation and Electrical Engineering, Jilin University, Changchun 130012, P. R. China.

\*Electronic-mail: liucx@jlu.edu.cn

ruansp@jlu.edu.cn

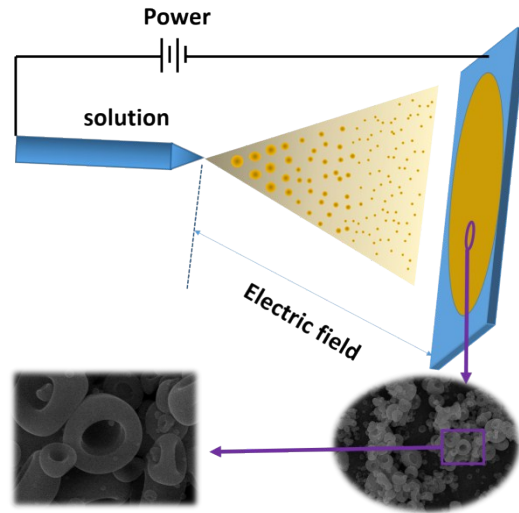

Fig. S1 Schematic diagram of electrospay process.

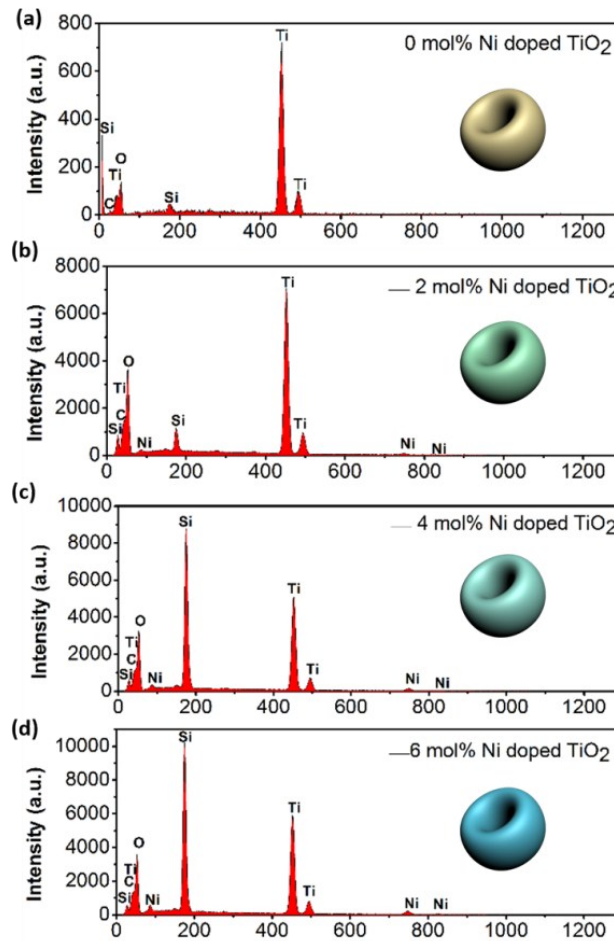

Fig. S2 EDX patterns of (a) 0 mol% (b) 2 mol % (c) 4 mol% (d) 6 mol% Ni doped  $\text{TiO}_2$  submicron particles.
